# Supplementary material for: Phosphorus-doped molybdenum disulfide facilitating the photocatalytic hydrogen production activity of CdS nanorod
Source: Royal Society of Chemistry journal article supplement (doi:10.1039/c9nj00411d), 2019-01-01
Supplement: c9nj00411d1.pdf [file c9nj00411d1.pdf]

## **Supporting Information**

### **Phosphorus-doped molybdenum disulfide facilitating the photocatalytic hydrogen production of CdS nanorod**

**Mei-Ling Xu, Xiu Tang, Yanju Wang, Fu-Tian Liu,\* Yuzhuo Zhang\* and Kui  
Li\***

School of Materials Science and Engineering, University of Jinan, Jinan 250022,  
China. Email: mse\_liuft@ujn.edu.cn; zhangyz053@nenu.edu.cn; mse\_lik@ujn.edu.cn.

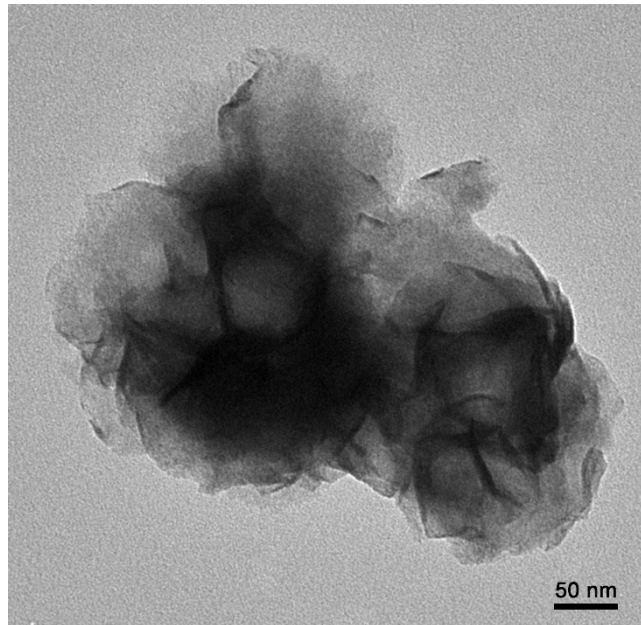

Fig. S1 TEM images of MoS<sub>2</sub> sample.

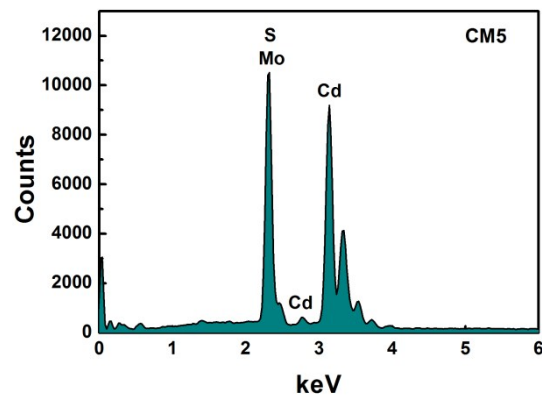

Fig. S2 EDS spectra of CM5.

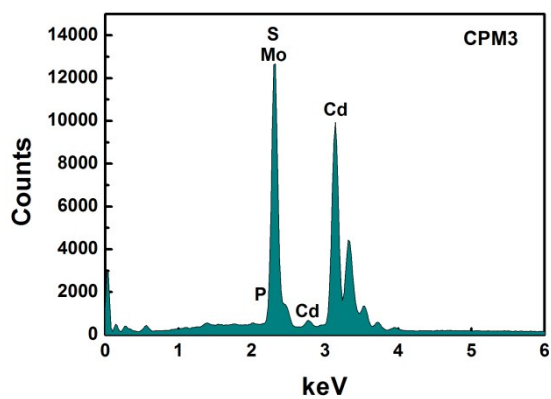

Fig. S3 EDS spectra of CPM3.

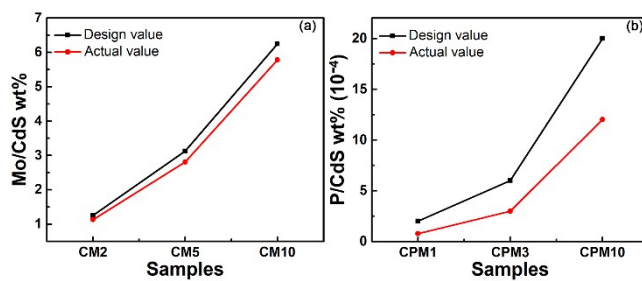

Fig. S4 Comparison of the design value and the actual value mass ratio of (a) Mo/CdS in CM2, CM5, and CM10 samples, (b) P/CdS in CPM1, CPM3, and CPM10 samples.

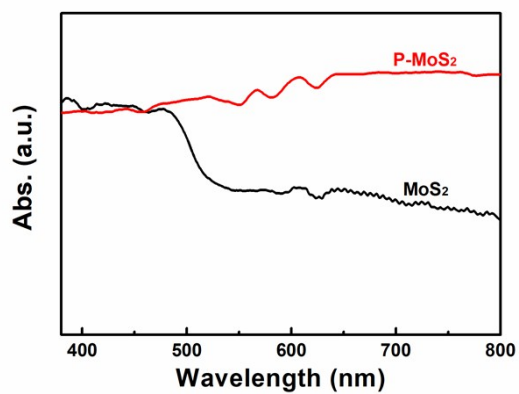

Fig. S5 UV-vis diffuse reflection spectra of MoS<sub>2</sub> and P-MoS<sub>2</sub>.

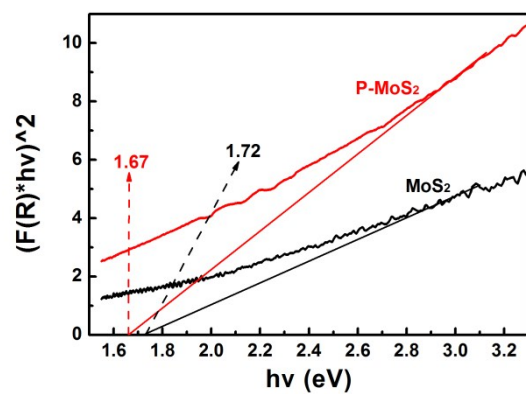

Fig. S7 The plot of transformed Kubeka-Munk function vs. the energy of MoS<sub>2</sub>, and P-MoS<sub>2</sub>.

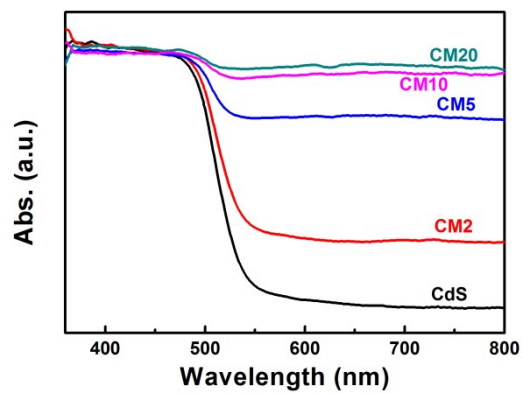

Fig. S6 UV-vis diffuse reflection spectra of CdS, CM2, CM5, CM10 and CM20.

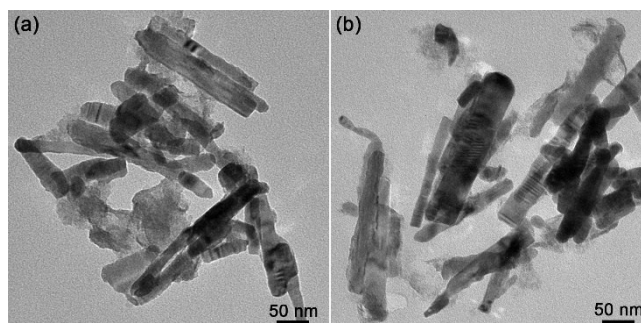

Fig. S8 TEM images of CM5 and CPM3 after the photocatalytic reaction.

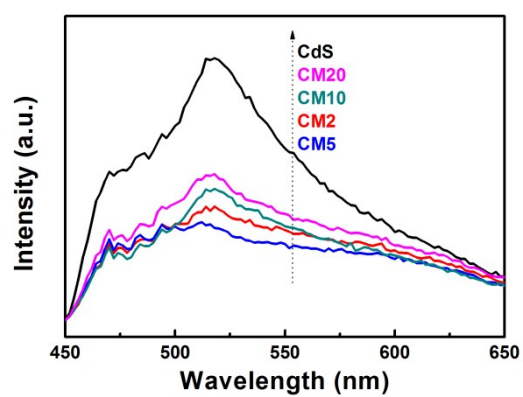

Fig. S9 PL spectra of CdS, CM2, CM5, CM10 and CM20.

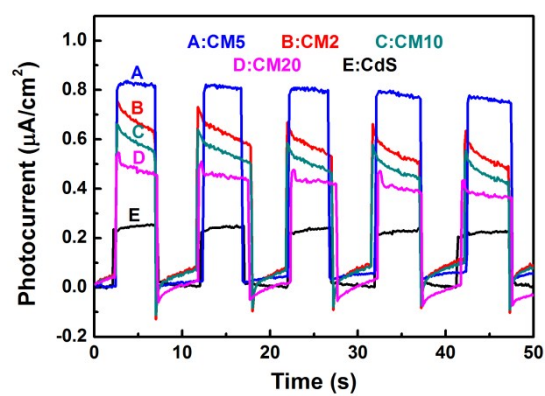

Fig. S10 Photocurrent responses of CdS, CM2, CM5, CM10 and CM20 electrodes.

Table S1 The overpotentials of CdS, CM5, CPM1, CPM3 and CPM10 at a current density of  $10 \text{ mA cm}^{-2}$ .

| Samples                      | CdS | CM5 | CPM1 | CPM3 | CPM10 |
|------------------------------|-----|-----|------|------|-------|
| The overpotential value (mV) | 756 | 663 | 497  | 453  | 581   |
